# Supplementary material
Source: MDPI journal article supplement (https://www.mdpi.com/2073-4344/10/2/178)
Supplement: s1 [file s1]

# **Homogeneous and heterogeneous catalysis impact on pyrolyzed cellulose to produce bio-oil**

**Siyi Li <sup>1</sup>, S. Cheng <sup>1</sup> and Jeffrey S. Cross<sup>1,\*</sup>,**

<sup>1</sup>Energy Science and Engineering, Department of Transdisciplinary Science and Engineering, Tokyo Institute of Technology, 2-12-1, Ookayama, Meguro, Tokyo 152-8552, Japan

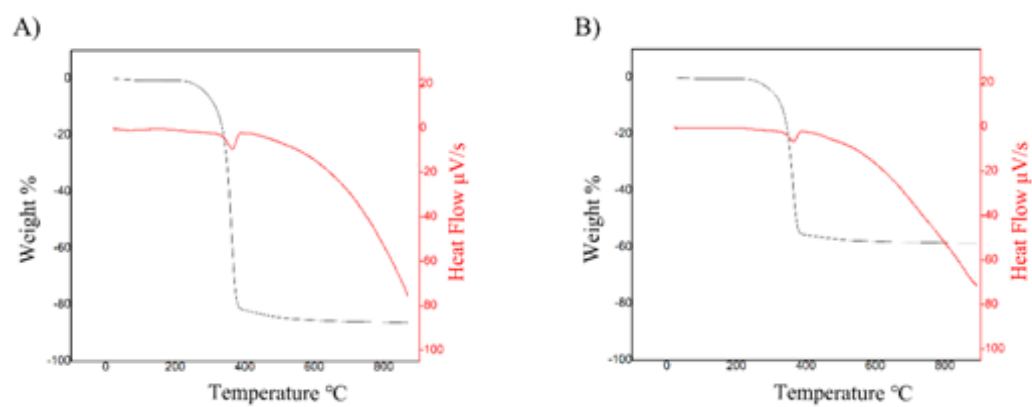

Figure S1. TG-DTA spectrum of a) cellulose b) cellulose with  $\text{Ni}_2\text{Fe}_3$  catalyst

Table S1 Specific bio-oil compounds measured by GC-MS without catalyst

| Compound name                             | Ret. Time (min) | Area percentage % |
|-------------------------------------------|-----------------|-------------------|
| 3-Penten-2-one, (E)-                      | 8.1             | 1.9               |
| 2-Propanone, 1-hydroxy-                   | 20.7            | 10.5              |
| 2-Cyclopenten-1-one                       | 25.0            | 2.4               |
| Acetic acid                               | 33.2            | 3.6               |
| Furfural                                  | 34.9            | 7.6               |
| Propanoic acid, 2-oxo-, methyl ester      | 35.6            | 1.6               |
| 2-Propanone, 1-(acetyloxy)-               | 35.8            | 1.1               |
| Ethanone, 1-(2-furanyl)-                  | 37.4            | 0.6               |
| 2-Cyclopenten-1-one, 3-methyl-            | 37.6            | 0.5               |
| Propanoic acid                            | 40.1            | 1.8               |
| 2-Butanone, 1-(acetyloxy)-                | 40.3            | 1.5               |
| 2-Furancarboxaldehyde, 5-methyl-          | 42.1            | 4.8               |
| Propanoic acid, 2-methyl-                 | 42.3            | 0.5               |
| Butyrolactone                             | 44.6            | 0.7               |
| Butanoic acid                             | 46.0            | 1.1               |
| 2(5H)-Furanone, 5-methyl-                 | 47.9            | 0.9               |
| 4-Methyl-2-oxo-(1H)-pyrimidine            | 48.8            | 1.4               |
| 2(5H)-Furanone                            | 52.1            | 0.9               |
| 1,2-Cyclopentanedione                     | 53.6            | 3.6               |
| Crotonic acid                             | 54.2            | 0.6               |
| 1,2-Cyclopentanedione, 3-methyl-          | 56.8            | 1.9               |
| 4-Methyl-5H-furan-2-one                   | 59.1            | 0.5               |
| Maltol                                    | 63.9            | 0.5               |
| Phenol                                    | 67.2            | 0.5               |
| Cyclopropyl carbinol                      | 70.1            | 0.6               |
| 4-Methyl-2-oxopentanenitrile              | 75.9            | 0.8               |
| Pentanoic acid, 4-oxo-                    | 78.4            | 0.8               |
| 1,4:3,6-Dianhydro-.alpha.-d-glucopyranose | 80.0            | 1.8               |
| 5-Hydroxymethylfurfural                   | 82.6            | 1.0               |
| .beta.-D-Glucopyranose, 1,6-anhydro-      | 98.354          | 44.0              |

Table S2 Specific bio-oil compounds measured by GC-MS with Ni<sub>2</sub>Fe<sub>3</sub> catalyst

| Compound name                             | Ret. Time (min) | Area percentage % |
|-------------------------------------------|-----------------|-------------------|
| 2-Butenal, (E)-                           | 5.0             | 0.6               |
| 3-Penten-2-one, (E)-                      | 8.4             | 1.6               |
| 2-Propanone, 1-hydroxy-                   | 21.5            | 13.1              |
| Acetic acid                               | 33.4            | 3.1               |
| 2-Propanone, 1-methoxy-                   | 34.3            | 7.3               |
| Furfural                                  | 35.7            | 9.3               |
| 2-Butanone                                | 35.8            | 0.4               |
| Propanoic acid, 2-oxo-, methyl ester      | 36.4            | 1.7               |
| 2-Propanone, 1-(acetyloxy)-               | 36.6            | 1.1               |
| Propanoic acid, ethyl ester               | 40.8            | 1.9               |
| 2-Butanone, 1-(acetyloxy)-                | 41.0            | 1.1               |
| 2-Furancarboxaldehyde, 5-methyl-          | 42.8            | 3.3               |
| Butanoic acid                             | 46.6            | 1.1               |
| Methylpent-4-enylamine                    | 47.4            | 0.5               |
| 2-Furanmethanol                           | 48.7            | 4.0               |
| 4-Methyl-2-oxo-(1H)-pyrimidine            | 49.5            | 1.0               |
| 2(5H)-Furanone                            | 52.8            | 0.5               |
| 1,2-Cyclopentanedione                     | 54.3            | 5.1               |
| Crotonic acid                             | 54.8            | 0.5               |
| 2-Methylene cyclopentanol                 | 56.0            | 0.4               |
| 1,2-Cyclopentanedione, 3-methyl-          | 57.4            | 2.5               |
| 4-Methyl-5H-furan-2-one                   | 59.7            | 0.4               |
| Phenol                                    | 68.0            | 0.6               |
| Phenol, 2-methyl-                         | 68.1            | 0.5               |
| Cyclopropyl carbinol                      | 70.8            | 1.5               |
| Pentanoic acid, 4-oxo-                    | 78.8            | 0.3               |
| Decane, 5,6-dimethyl-                     | 79.7            | 0.5               |
| 1,4:3,6-Dianhydro-.alpha.-d-glucopyranose | 80.4            | 1.3               |
| 5-HydroxymethylFurfural                   | 83.0            | 4.7               |
| .beta.-D-Glucopyranose, 1,6-anhydro-      | 98.7            | 30.0              |

Table S3 Specific bio-oil compounds measured by GC-MS with ZSM-5 catalyst

| Compound name                                | Ret. Time (min) | Area percentage % |
|----------------------------------------------|-----------------|-------------------|
| 2,3-Pentanedione                             | 5.4             | 0.5               |
| 3-Penten-2-one, (E)-                         | 8.1             | 0.8               |
| 2-Propanone, 1-hydroxy-                      | 20.3            | 12.2              |
| 2-Cyclopenten-1-one                          | 24.9            | 2.1               |
| 2-Cyclopenten-1-one, 2-methyl-               | 26.2            | 0.7               |
| 1-Hydroxy-2-butanone                         | 27.2            | 0.6               |
| Acetic acid                                  | 33.8            | 5.2               |
| Furfural                                     | 34.9            | 9.4               |
| 2-Butanone                                   | 35.0            | 0.6               |
| Propanoic acid, 2-oxo-, methyl ester         | 35.6            | 1.5               |
| 2-Propanone, 1-(acetyloxy)-                  | 35.8            | 1.1               |
| Ethanone, 1-(2-furanyl)-                     | 37.4            | 1.0               |
| Propanoic acid, ethenyl ester                | 40.1            | 0.5               |
| Propanoic acid                               | 40.3            | 2.1               |
| 2-Furancarboxaldehyde, 5-methyl-             | 42.1            | 4.0               |
| Tetrazolo[1,5-b]pyridazine, 6-(1-piperidyl)- | 44.6            | 0.8               |
| Butanoic acid                                | 46.0            | 1.0               |
| 2(5H)-Furanone, 5-methyl-                    | 47.9            | 0.9               |
| 4-Methyl-2-oxo-(1H)-pyrimidine               | 48.8            | 1.4               |
| 2(5H)-Furanone                               | 52.1            | 1.2               |
| 1,2-Cyclopentanedione                        | 53.6            | 3.1               |
| 1,2-Cyclopentanedione, 3-methyl-             | 56.8            | 1.7               |
| 4-Methyl-5H-furan-2-one                      | 59.1            | 0.7               |
| Cyclopropyl carbinol                         | 70.1            | 0.8               |
| 1,4-Dioxaspiro[2.4]heptan-5-one, 7-methyl-   | 72.3            | 0.7               |
| 4-Methyl-2-oxopentanenitrile                 | 75.9            | 0.8               |
| Pentanoic acid, 4-oxo-                       | 78.4            | 0.8               |
| 1,4:3,6-Dianhydro-.alpha.-D-glucopyranose    | 79.9            | 0.8               |
| 5-Hydroxymethylfurfural                      | 82.6            | 1.2               |
| .beta.-D-Glucopyranose, 1,6-anhydro-         | 98.2            | 41.5              |

Table S4 Specific bio-oil compounds measured by GC-MS with Ni<sub>2</sub>Fe<sub>3</sub>/ZSM-5 catalyst

| Compound name                              | Ret. Time (min) | Area percentage % |
|--------------------------------------------|-----------------|-------------------|
| 2,3-Pentanedione                           | 5.4             | 0.6               |
| 3-Penten-2-one, (E)-                       | 8.0             | 1.1               |
| 2-Propanone, 1-hydroxy-                    | 20.2            | 13.4              |
| 2-Cyclopenten-1-one                        | 24.8            | 1.7               |
| 2-Cyclopenten-1-one, 2-methyl-             | 26.2            | 0.7               |
| 1-Hydroxy-2-butanone                       | 27.2            | 0.7               |
| Acetic acid                                | 33.9            | 5.6               |
| Furfural                                   | 34.8            | 9.6               |
| 2-Butanone                                 | 35.0            | 1.1               |
| Propanoic acid, 2-oxo-, methyl ester       | 35.5            | 2.4               |
| 2-Propanone, 1-(acetyloxy)-                | 35.8            | 1.1               |
| Ethanone, 1-(2-furanyl)-                   | 37.4            | 1.0               |
| 2-Butanone, 1-(acetyloxy)-                 | 40.0            | 0.8               |
| Propanoic acid                             | 40.3            | 2.1               |
| 2-Furancarboxaldehyde, 5-methyl-           | 42.0            | 4.4               |
| Butyrolactone                              | 44.5            | 0.8               |
| Butanoic acid                              | 46.0            | 0.9               |
| 2(5H)-Furanone, 5-methyl-                  | 47.9            | 1.1               |
| 4-Methyl-2-oxo-(1H)-pyrimidine             | 48.8            | 1.2               |
| 2(5H)-Furanone                             | 52.0            | 1.2               |
| 1,2-Cyclopentanedione                      | 53.5            | 3.5               |
| 1,2-Cyclopentanedione, 3-methyl-           | 56.7            | 1.6               |
| Cyclopropyl carbinol                       | 70.1            | 0.9               |
| 1,4-Dioxaspiro[2.4]heptan-5-one, 6-methyl- | 72.3            | 0.8               |
| 4-Methyl-2-oxopentanenitrile               | 75.9            | 0.8               |
| 2,3-Anhydro-d-mannosan                     | 76.2            | 0.8               |
| Pentanoic acid, 4-oxo-                     | 78.3            | 0.8               |
| 1,4:3,6-Dianhydro-.alpha.-d-glucopyranose  | 79.9            | 0.8               |
| 5-Hydroxymethylfurfural                    | 82.6            | 1.8               |
| .beta.-D-Glucopyranose, 1,6-anhydro-       | 98.2            | 36.5              |

Table S5 Specific bio-oil compounds measured by GC-MS with ZSM-5 catalyst

| Compound name                             | Ret. Time (min) | Area percentage % |
|-------------------------------------------|-----------------|-------------------|
| 2-Propen-1-ol                             | 8.1             | 1.3               |
| 3-Penten-2-one, (E)-                      | 8.3             | 2.1               |
| Cyclopentanone                            | 11.1            | 0.6               |
| 2-Propanone, 1-hydroxy-                   | 21.1            | 16.4              |
| 2-Cyclopenten-1-one                       | 25.6            | 2.2               |
| 1-Hydroxy-2-butanone                      | 27.9            | 1.5               |
| Acetic acid                               | 33.8            | 5.6               |
| Furfural                                  | 35.6            | 13.1              |
| Propanoic acid, 2-oxo-, methyl ester      | 36.2            | 1.7               |
| 2-Propanone, 1-(acetyloxy)-               | 36.4            | 1.2               |
| Ethanone, 1-(2-furanyl)-                  | 38.1            | 1.6               |
| Propanoic acid, ethenyl ester             | 40.7            | 0.8               |
| Propanoic acid                            | 40.8            | 3.8               |
| 2-Furancarboxaldehyde, 5-methyl-          | 42.7            | 5.1               |
| Butyrolactone                             | 45.2            | 0.9               |
| Butanoic acid                             | 46.5            | 2.2               |
| 2-Furanmethanol                           | 48.6            | 3.0               |
| 4-Methyl-2-oxo-(1H)-pyrimidine            | 49.4            | 0.9               |
| 2(5H)-Furanone                            | 52.7            | 0.7               |
| 1,2-Cyclopentanedione                     | 54.1            | 4.0               |
| 2-Butenoic acid, (E)-                     | 54.8            | 0.6               |
| 2-Cyclopenten-1-one, 2-hydroxy-3-methyl-  | 57.3            | 2.2               |
| Phenol                                    | 67.9            | 1.0               |
| Phenol, 2-methyl-                         | 68.0            | 1.1               |
| Cyclopropyl carbinol                      | 70.7            | 0.7               |
| Phenol, 3-methyl-                         | 71.6            | 0.5               |
| Pentanoic acid, 4-oxo-                    | 78.7            | 0.6               |
| 1,4:3,6-Dianhydro-.alpha.-d-glucopyranose | 80.3            | 1.0               |
| 5-Hydroxymethylfurfural                   | 83.0            | 3.1               |
| .beta.-D-Glucopyranose, 1,6-anhydro-      | 98.5            | 20.5              |

Table S6 Specific bio-oil compounds measured by GC-MS with Ni<sub>2</sub>Fe<sub>3</sub>/ZSM-5 catalyst

| Compound name                             | Ret. Time (min) | Area percentage % |
|-------------------------------------------|-----------------|-------------------|
| 3-Penten-2-one, (E)                       | 8.3             | 2.2               |
| 2-Propen-1-ol                             | 8.4             | 1.1               |
| 2-Propanone, 1-hydroxy-                   | 21.4            | 23.7              |
| 2-Cyclopenten-1-one                       | 25.6            | 2.1               |
| 2-Cyclopenten-1-one, 2-methyl-            | 26.8            | 1.0               |
| 1-Hydroxy-2-butanone                      | 28.0            | 1.4               |
| Acetic acid                               | 33.6            | 5.2               |
| Furfural                                  | 35.6            | 12.4              |
| Propanoic acid, 2-oxo-, methyl ester      | 36.2            | 1.1               |
| 2-Propanone, 1-(acetyloxy)-               | 36.4            | 1.5               |
| Ethanone, 1-(2-furanyl)-                  | 38.1            | 1.3               |
| Formic acid                               | 38.2            | 1.3               |
| Propanoic acid                            | 40.6            | 2.3               |
| 2-Butanone, 1-(acetyloxy)                 | 40.9            | 1.4               |
| 2-Furancarboxaldehyde, 5-methyl-          | 42.7            | 3.9               |
| Propanoic acid, 2-methyl-                 | 42.8            | 0.6               |
| Butyrolactone                             | 45.2            | 1.1               |
| Butanoic acid                             | 46.5            | 2.2               |
| 2-Furanmethanol                           | 48.6            | 2.3               |
| 2(5H)-Furanone                            | 52.7            | 0.8               |
| 6-Oxa-bicyclo[3.1.0]hexan-3-one           | 54.1            | 4.6               |
| 2-Cyclopenten-1-one, 2-hydroxy-3-methyl-  | 57.2            | 2.5               |
| Phenol                                    | 67.8            | 0.8               |
| Phenol, 2-methyl-                         | 68.0            | 0.6               |
| Cyclopropyl carbinol                      | 70.6            | 0.9               |
| 2,3-Anhydro-d-mannosan                    | 76.7            | 0.6               |
| Decane, 5,6-dimethyl-                     | 79.7            | 0.4               |
| 1,4:3,6-Dianhydro-.alpha.-d-glucopyranose | 80.3            | 1.0               |
| 5-Hydroxymethylfurfural                   | 82.9            | 2.3               |
| .beta.-D-Glucopyranose, 1,6-anhydro-      | 98.5            | 17.4              |
